# Supplementary material for: Photostabilities and anti-tumor effects of curcumin and curcumin-loaded polydopamine nanoparticles
Source: Royal Society of Chemistry journal article supplement (doi:10.1039/d4ra01246a), 2024-01-01
Supplement: d4ra01246a1.pdf [file d4ra01246a1.pdf]

## **Supporting Information**

### **Photostabilities and anti-tumor effects of curcumin and curcumin-loaded polydopamine nanoparticle**

Shufeng Yan,<sup>\*a</sup> Xiaoyun Liao,<sup>a</sup> Qi Xiao,<sup>a</sup> Qingqing Huang<sup>a</sup> and Xiaochen Huang<sup>b</sup>

<sup>a</sup> Medical Plant Exploitation and Utilization Engineering Research Center, Sanming University,  
Sanming, Fujian 365004, China.

<sup>b</sup> State Key Laboratory of Structural Chemistry, Fujian Institute of Research on the Structure of  
Matter, Chinese Academy of Sciences, Fuzhou, Fujian 350002, China.

E-mail: Shufeng Yan, [ysfready@fjismu.edu.cn](mailto:ysfready@fjismu.edu.cn)

## **Contents**

- 1. Figure S1.** Illumination of red (A) and blue (B) light on curcumin.

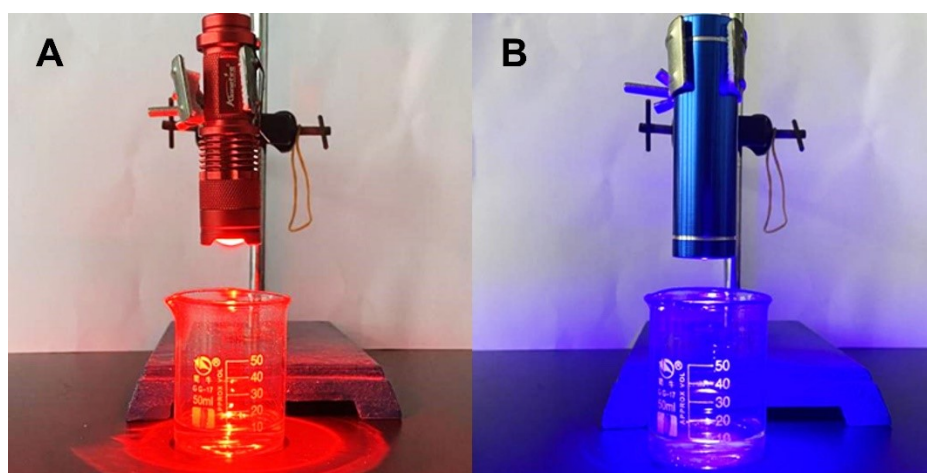

**Figure S1** Illumination of red (A) and blue (B) light on curcumin
